The *total weight* of all animals per square metre varied between 25 and 206 gm. per square metre on "Gyttja" bottom; the *total number* varied between 111 and 7,604 individuals per square metre. In respect of number as well as weight the Tvärminne district showed higher figures than the Pellinge; it should be mentioned, however, that the samples were taken in different years and are therefore not strictly comparable.

Comparing the *total numbers* per square metre at various depths of "Gyttja" bottom it will be seen that they decrease from shallow water down to 19—28 m. and then increase in the deeper zone, 31—37 m. This is due to the fact that the more common species, *Chironomid* larvae and *Corophium*, become rarer from shallow towards deep water. The increase in number towards deep water is due to a single species, *Pontoporeia affinis*. On the other hand, the *total weight* steadily decreases from shallow water towards the deep, due to a decrease in number of *Macoma baltica*, *Chironomids* and *Cardium edule*.

Only a few species predominate in both number and weight in the "Gyttja" bottom areas; in shallow water *Macoma baltica*, *Pontoporeia affinis*, *Corophium* and *Chironomids* predominate in number; the deeper water is characterized by two species only, *Macoma* and *Pontoporeia*. This fact is still more pronounced if weight only is considered, all other species being of practically no importance as compared to *Macoma baltica*. So heavily does this species predominate in weight that in shallow water its weight amounts to 70—100% of the total weight of all animals. At 10—30 m. depth it amounts to 90—100% of the total weight, and in still deeper water the percentage varies from 70 to 90%, *Pontoporeia* participating here with 13—26% of the total weight.

Great quantities of *Pontoporeia* were caught on "Gyttja" bottoms with loose red algae (*Phyllophora*, *Furcellaria*), but other crustacea such as *Gammarus* and *Mesidotea* were also more numerous here than on the naked soft bottoms.

It is clear that this work gives a great deal of particularly useful information on the character and composition of the bottom fauna in these Finnish waters. The somewhat lengthy report also contains a number of tables, diagrams and figures (showing, amongst other things, the bottom animals in their natural size and density per square metre) including aerial photographs of the districts investigated. Although the *plates* are beautifully represented, the charts and diagrams are on much too small a scale (especially those opposite page 62) and the use of them is, therefore, somewhat limited.

Considering the great number of samples taken and the amount of work evidently carried out one might have expected more extensive information on the biology of the species, their growth, spawning season, age, annual production etc., but probably the author intends to consider these problems more closely in the contemplated continuation of this work, to which the present work may be considered a good introduction.

H. Blegvad.

**E. C. Scofield.** "Early Life History of the California Sardine (*Sardina caerulea*), with special reference to distribution of eggs and larvae." Div. Fish and Game, Calif., Fish. Bull. No. 41. Sacramento, 1934.

Ce fascicule donne les résultats obtenus au cours de quatre années de recherches (1929—1932) entreprises dans le but de pouvoir déterminer à l'avance l'importance de chaque classe dans la composition du stock des

sardines pêchées sur les côtes de Californie. Pour cela on a d'abord cherché à délimiter l'emplacement des aires de pontes, à s'assurer que la situation de celles-ci variait peu d'une année à l'autre, à faire une étude quantitative des oeufs et des larves, à suivre ces dernières dans leurs migrations et leur croissance. Au cours de ces quatre années, 358 stations ont été effectuées couvrant une surface de 25,200 milles carrés.

Il a été reconnu que, si l'aire totale de ponte s'étend sur une largeur de 250 milles du Cap San Lucas au N. de San Francisco, l'aire principale de ponte est beaucoup plus réduite; large de 200 milles, longue de 100 milles, elle s'est trouvée chaque année localisée dans l'espace compris entre San Diego et Point Conception. Dans cette région, les captures accusent deux fois plus d'oeufs et de larves que dans toute l'étendue de l'aire de ponte. Une pareille concentration des reproducteurs sur une aussi faible étendue est tout-à-fait remarquable. Cela tient en grande partie aux conditions requises pour la ponte qui ne peut s'effectuer dans des eaux dont la température est inférieure à 15° C. L'importance de ce facteur se traduit d'ailleurs par les quelques fluctuations observées d'une année à l'autre dans la délimitation précise de l'aire principale de ponte qui s'étend plus au moins vers le large suivant que la température est plus (1930 et 1931) ou moins (1929 et 1932) élevée.

D'une ponte abondante, on ne peut déduire une bonne année de pêche qu'à la condition de suivre le sort des larves. C'est pourquoi on s'est employé à rechercher leur lieu de rassemblement. Le jeu des courants fait qu'elles sont entraînées vers le S. de Point Conception jusqu'au voisinage de Magdalena Bay. On peut en faire dans ces parages d'abondantes récoltes en pêchant à 15 brasses environ de profondeur, et suivre leurs transformations jusqu'à la taille de 35 mm., c'est-à-dire jusqu'à leur métamorphose.

Dans les jeunes stades, elles se nourrissent presque exclusivement de Copépodes, tandis que les Diatomées font la base de la nourriture des immatures et des adultes. Cela tient à ce que le filtre branchial n'est définitivement constitué et n'est apte à retenir les proies de faibles dimensions que lorsque l'alevin a dépassé 100 mm. de longueur. L'auteur suit avec soin ces modifications importantes et donne une description détaillée de l'oeuf et des stades larvaires et post-larvaires.

L. F.

**C. F. Hickling.** "The Natural History of the Hake, Pt. IV. Age-Determination and the Growth-Rate." Min. Agric. and Fish., Fish. Invest., Ser. II, Vol. XIII, No. 2, 1933. London, 1933.

In this, the fourth of his serial papers on the natural history of the Hake, Mr. Hickling sets out the conclusions he has reached on the difficult questions of age and growth-rate. The difficulty lies in the fact that in this species none of the methods usually available, otoliths, scales or length frequencies, is entirely satisfactory. Scale reading after a trial was rejected as unreliable. Of the otoliths only about 40 % could be read with confidence and a further 40 % read at all. The length frequency curves, drawn from the market measurements and from the catches of the research vessel, showed a series of modes which advanced in length from month to month and agreed fairly well in position with the sizes in successive years deduced from the otolith readings.

Using the last two methods of estimation the author deduces for the hake an average increase in length of a little under 9 cm. per annum for the first eight years of its life. The hake, unlike, for example, the plaice
